# Supplementary material for: Epitope-coated polymer particles elicit neutralising antibodies against Plasmodium falciparum sporozoites
Source: PubMed Central journal article supplement (PMC8630014; doi:10.1038/s41541-021-00408-2), 2021-11-29
Supplement: 41541_2021_408_MOESM1_ESM.pdf [file 41541_2021_408_MOESM1_ESM.pdf]

## Supplementary Material

### Epitope-coated polymer particles elicit neutralizing antibodies against

#### *Plasmodium falciparum* sporozoites

Ben Evert<sup>1</sup>, Shuxiong Chen<sup>1</sup>, Julie Healer<sup>2</sup>, Alan Cowman<sup>2</sup>, Ryan Steel<sup>2</sup>, Robyn McConville<sup>2</sup>, Justin Boddey<sup>2</sup>, Lucas Huntimer<sup>3</sup> and Bernd H.A. Rehm<sup>1,4\*</sup>,

<sup>1</sup>Centre for Cell Factories and Biopolymers, Griffith Institute for Drug Discovery, Griffith University, Brisbane, Australia.

<sup>2</sup>Walter and Eliza Hall Institute of Medical Research, Melbourne, Australia

<sup>3</sup>Elanco, Indianapolis, USA

<sup>4</sup>Menzies Health Institute Queensland (MHIQ), Griffith University, Gold Coast, Australia.

**Supplementary Table 1.** Sequences of proteins used in this study.

| <b>Fusion Protein</b>    | <b>Sequence</b>                                                                                                                                                                                                                                                                                                                                                                                                                                                                                                                                                                                                                                                                                                                                                           | <b>Size</b> |
|--------------------------|---------------------------------------------------------------------------------------------------------------------------------------------------------------------------------------------------------------------------------------------------------------------------------------------------------------------------------------------------------------------------------------------------------------------------------------------------------------------------------------------------------------------------------------------------------------------------------------------------------------------------------------------------------------------------------------------------------------------------------------------------------------------------|-------------|
| PhaC                     | MATGKGAAASTQEGKSQPFKVTGPFDPATWLEWSRQWQGTEG<br>NGHAAASGIPGLDALAGVKIAPAQLGDIQQRYSALWQAMAEG<br>KAEATGPLHRRRFAGDAWRTNLPYRFAAAFYLLNARALTELADAVE<br>ADAKTRQIRFAISQWVDAMSPANFLATNPEAQRLLIESGGESLRA<br>GVRNMMEDLTRGKISQTDESAFEVGRNVAVTEGAVVFENEYFQLL<br>QYKPLTDKVVHARPLLMVPPCINKYYILDLPESLVRHVVEQGHTVF<br>LWSWRNPDASMAGSTWDDYIEHAAIRAIEVARDISGQDKINVLGFCV<br>GGTIVSTALAVLAARGEHPAASVTLLTLLDFADTGILDVDFVDEGHVQ<br>LREATLGGGAGAPCALLRGLELANTFSFLRPNDLVWNYVVDNYLKG<br>NTPVPFDLLFWNGDATNLPGPWYCWYLRHTYLQNELKVPKLTVC<br>GVPVDLASIDVPTYIYGSREDHIVPWTAAAYASTALLANKLRFVLGAS<br>GHIAGVINPPAKNKRSHWTNDALPESPQQWLAGAIEHHGSWWPD<br>WTAWLAGQAGAKRAAPANYGNARYRAIEPAPGRYVKAKA                                                                                                                    | 64.33 kDa   |
| B cell epitope-PhaC      | MNANPNANPNANPNANPNANPNANP-Linker-ATGKGAAASTQEG<br>KSQPFKVTGPFDPATWLEWSRQWQGTEGNGHAAASGIPGLDAL<br>AGVKIAPAQLGDIQQRYSALWQAMAEGKAEATGPLHRRRF<br>GDAWRTNLPYRFAAAFYLLNARALTELADAVEADAKTRQIRFAISQ<br>WVDAMSPANFLATNPEAQRLLIESGGESLRAGVRNMMEDLTRGKIS<br>QTDESAFEVGRNVAVTEGAVVFENEYFQLLQYKPLTDKVVHARPLLM<br>VPPCINKYYILDLPESLVRHVVEQGHTVFLVSWRNPDASMAGST<br>WDDYIEHAAIRAIEVARDISGQDKINVLGFCVGGTIVSTALAVLAARG<br>EHPAASVTLLTLLDFADTGILDVDFVDEGHVQLREATLGGGAGAPCA<br>LLRGLELANTFSFLRPNDLVWNYVVDNYLKGNTVPFDLLFWNGDA<br>TNLPGPWYCWYLRHTYLQNELKVPKLTVCGVPVDLASIDVPTYIY<br>GSREDHIVPWTAAAYASTALLANKLRFVLGASGHIAGVINPPAKNKR<br>SHWTNDALPESPQQWLAGAIEHHGSWWPDWTAWLAGQAGAKRAA<br>PANYGNARYRAIEPAPGRYVKAKA                                                                                  | 67.07 kDa   |
| B/T cell epitope-PhaC    | MDPNANPNVDPNANPNVNANPNANPNANPEYLNKIQNSLSTEWSP<br>CSVTDPNANPNVDPNANPNVNANPNANPNANPEYLNKIQNSLSTE<br>WSPCSVT-Linker-ATGKGAAASTQEGKSQPFKVTGPFDPATWLE<br>WSRQWQGTEGNGHAAASGIPGLDALAGVKIAPAQLGDIQQRYSAL<br>WQAMAEGKAEATGPLHRRRFAGDAWRTNLPYRFAAAFYLLN<br>ARALTELADAVEADAKTRQIRFAISQWVDAMSPANFLATNPEAQR<br>LLIESGGESLRAGVRNMMEDLTRGKISQTDESAFEVGRNVAVTEGA<br>VVFENEYFQLLQYKPLTDKVVHARPLLMVPPCINKYYILDLPESLVR<br>HVVEQGHTVFLVSWRNPDASMAGSTWDDYIEHAAIRAIEVARDIS<br>GQDKINVLGFCVGGTIVSTALAVLAARGEHPAASVTLLTLLDFADT<br>GILDVDFVDEGHVQLREATLGGGAGAPCALLRGLELANTFSFLRPND<br>LVWNYVVDNYLKGNTVPFDL<br>LFWNGDATNLPGPWYCWYLRHTYLQNELKVPKLTVCGVPVDLAS<br>IDVPTYIYGSREDHIVPWTAAAYASTALLANKLRFVLGASGHIAGVINP<br>PAKNKRSHWTNDALPESPQQWLAGAIEHHGSWWPDWTAWLAGQ<br>AGAKRAAPANYGNARYRAIEPAPGRYVKAKA | 74.92 kDa   |
| B cell epitope peptide   | MNANPNANPNANPNANPNANPNANP                                                                                                                                                                                                                                                                                                                                                                                                                                                                                                                                                                                                                                                                                                                                                 | 2.53 kDa    |
| B/T cell epitope peptide | MDPNANPNVDPNANPNVNANPNANPNANPEYLNKIQNSLSTEWSP<br>CSVTDPNANPNVDPNANPNVNANPNANPNANPEYLNKIQNSLSTE<br>WSPCSVT                                                                                                                                                                                                                                                                                                                                                                                                                                                                                                                                                                                                                                                                 | 10.25 kDa   |

**Supplementary Table 2.** Identification of proteins using tryptic peptide fingerprinting applying MALDI-TOF/MS.

Identified peptides are highlighted in green.

| Sample Name                          | Identified Peptides                                                                                                                                                                                                                                                                                                                                                                                                                                                                                                                                                                                                                                                                                                                                                                                                                                                                                                                                     |
|--------------------------------------|---------------------------------------------------------------------------------------------------------------------------------------------------------------------------------------------------------------------------------------------------------------------------------------------------------------------------------------------------------------------------------------------------------------------------------------------------------------------------------------------------------------------------------------------------------------------------------------------------------------------------------------------------------------------------------------------------------------------------------------------------------------------------------------------------------------------------------------------------------------------------------------------------------------------------------------------------------|
| B cell epitope-PhaC fusion protein   | <p><b>B cell epitope:</b><br/>MNANPNANPNANPGPGGNANPNANPNANP</p> <p><b>PhaC:</b><br/>ATGKGAAASTQEGKSQPFKVTGPFDPATWLEWSRQWQGTEGNHAAA<br/>SGIPGLDALAGVK<b>APAQLGDIQQR</b>YMKDFSALWQAMAEGK<b>AEATGPLHD</b><br/><b>RRFAGDAWRTNLPYRFAAAFYLLNAR</b>ALTELADAVEADAKTRQRIRFAISQ<br/>WVDAMSPANFLATNPEAQR<b>LLIESGGESLR</b>AGVRNMMEDLTRGK<b>ISQTDE</b><br/><b>SAFEVGR</b>NVAVTEGAVVFENEYFQLLQYKPLTDKVVHARPLLMVPPCINK<b>YY</b><br/><b>ILDLPQESSLVRHVVEQGHTVFLVSWR</b>NPDASMAGSTWDDYIEHAAIRAIE<br/>VARDISGQDKINVLGFCVGGTIVSTALAVLAARGEHPAASVTLTLLDFADT<br/>GILDVVFDEGHVQLR<b>EATLGGGAGAPCALLR</b>GLELANTFSFLRPNDLVWN<br/>YVVDNYLKGNTVPFDLLFWNGDATNLPGPWYCWYLRHTYLQNELKVP<br/>K<b>LTVCGVPVDLASIDVPTYIYGSR</b>EDHIVPWTAAASTALLANKLRFVLGAS<br/>GHIAGVINPPAKNKRSHWTNDALPESPQQWLAGAIEHHGSSWWPDWTAWL<br/>AGQAGAKR<b>AAPANYGNAR</b>YR<b>AIEPAPGR</b>YVKAKA</p>                                                                                                               |
| B/T cell epitope-PhaC fusion protein | <p><b>B/T cell epitope:</b><br/>MDPNANPNVDPNANPNVNANPNANPNANPEYLNKIQNSLSTEWSPCSVT<br/>GPGP<b>GDPNANPNVD</b>PNANPNVNANPNANPNANPEYLNKIQNSLSTEWSP<br/>CSVT</p> <p><b>PhaC:</b><br/>ATGKGAAASTQEGKSQPFKVTGPFDPATWLEWSRQWQGTEGNHAAA<br/>SGIPGLDAL<b>AGVKIAPAQLGDIQQR</b>YMKDFSALWQAMAEGKAEATGPLHD<br/>RRF<b>AGDAWRTNLPYRFAAAFY</b>LLNARALTELADAVEADAKTRQRIRFAISQ<br/>WVDAMSPANF<b>LATNPEAQRLL</b>IESGGESLRAGVRNMMEDL<b>TRGKISQTDE</b><br/><b>SAFEVGRNVAVTEGAVVF</b>ENEYFQLLQYKPLTDKVVHARPLLMVPPCINKYY<br/>ILDLPQESSL<b>VRHVVEQGHTVFLVSWR</b>NPDASMAGSTWDDYIEHAAIR<b>AIE</b><br/><b>VARDISGQDKINVL</b>GFCVGGTIVSTALAVL<b>AARGEHPAASVTLT</b>TLLDFAD<br/>TGILDVVFDEGHVQLREATLGGGAGAPCALL<b>RGLELANTFSFLRPNDLVW</b><br/>NYVVDNYLKGNTVPFDLLFWNGDATNLPGPWYCWY<b>YLRHTY</b>LQNELKVP<br/>GKLTVCVGPVDLASIDVPTYIY<b>GSREDHIVPW</b>TAAASTALLANKLRFVLGA<br/>SGHIAGVINPPAKNKRSHWTNDALPESPQQWLAGAIEHHGSSWWPDWTAW<br/><b>L</b>AGQAGAKRAAPANYGNARY<b>RAIEPAPGR</b>YVKAKA</p> |

**Supplementary Table 3.** Strains used in this study.

| <b>Isolate</b>            | <b>Use</b>                              | <b>Notable features</b>                                      | <b>Reference</b>                        |
|---------------------------|-----------------------------------------|--------------------------------------------------------------|-----------------------------------------|
| <i>E. coli</i> Top10      | Plasmid propagation                     |                                                              | Invitrogen, Carlsbad, CA, United States |
| <i>E. coli</i> Clearcoli  | PHB bead production                     | Containing pMCS69 (Cm <sup>R</sup> ). Induction via 1mM IPTG | 1                                       |
| <i>P. falciparum</i> NF54 | Sporozoite staining and traversal assay |                                                              | 2                                       |
| HC-04 hepatocytes         | Cell traversal assay                    |                                                              | 3                                       |

**Supplementary Table 4.** Plasmids used in this study.

| <b>DNA</b>                     | <b>Use</b>                                                | <b>Notable features</b>                                      | <b>Reference</b> |
|--------------------------------|-----------------------------------------------------------|--------------------------------------------------------------|------------------|
| pET14b-phaC                    | Encodes PhaC for PHB production                           | phaC (64.33 kDa) under T7 promoter, Amp 100                  | 4                |
| pMCS69                         | Encodes PhaA and PhaB for PHB production                  | phaA, phaB under CAT promoter, Cm 50                         | 4                |
| pET14b B cell epitope-PhaC     | Encodes PHB synthase fusion with B cell epitopes          | B cell epitope-PhaC (64.33 kDa) under T7 promoter, Amp 100   | This study       |
| pET14b B/T cell epitope-PhaC   | Encodes PHB synthase fusion with B/T cell epitopes        | B/T cell epitope-PhaC (74.92 kDa) under T7 promoter, Amp 100 | This study       |
| pET14b PhaC-(GB1) <sub>3</sub> | Encodes PHB synthase fusion with protein G binding domain | PhaC-(GB1) <sub>3</sub> under T7 promoter, Amp 100           | 5                |

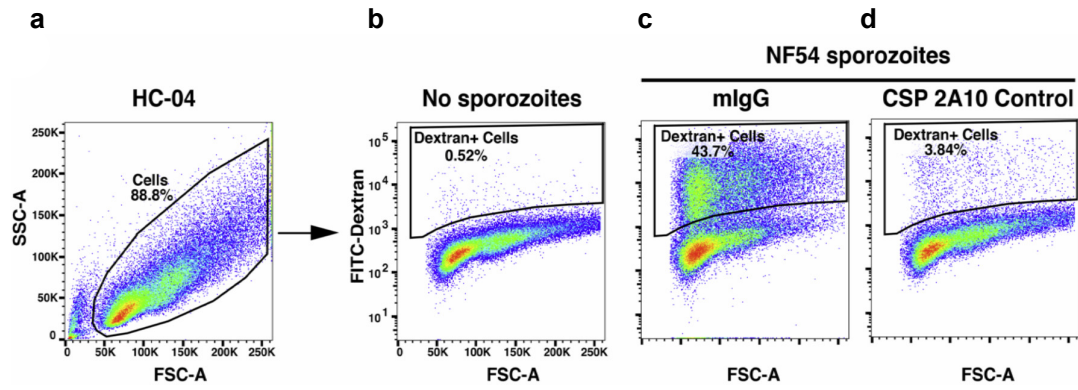

**Supplementary Figure 1.** Gating strategy used in FACS analysis to generate traversal inhibition data shown in Figure 6. FACS dot plots measuring FITC-dextran uptake into human HC-04 hepatocytes following incubation with sporozoites (traversal). a, shows gating for HC-04 cells. b, shows no sporozoite control. c, shows addition of sporozoites in the presence of naïve mouse IgG (10  $\mu$ g/ml). d, shows addition of sporozoites in the presence of mouse anti-CSP 2A10 control antibodies (monoclonal anti-NANP3 antibodies). Shown is a single representative of three experiments. The same gating strategy was previously used to assess cell traversal by *P. falciparum* (see Figures 4 in Yang et al <sup>6,7</sup>).

## References

- 1 Amara, A. A. & Rehm, B. H. Replacement of the catalytic nucleophile cysteine-296 by serine in class II polyhydroxyalkanoate synthase from *Pseudomonas aeruginosa*-mediated synthesis of a new polyester: identification of catalytic residues. *Biochem J* **374**, 413-421, doi:10.1042/BJ20030431 (2003).
- 2 Ponnudurai, T., Leeuwenberg, A. D. & Meuwissen, J. H. Chloroquine sensitivity of isolates of *Plasmodium falciparum* adapted to in vitro culture. *Trop Geogr Med* **33**, 50-54 (1981).
- 3 Sattabongkot, J. *et al.* Establishment of a human hepatocyte line that supports in vitro development of the exo-erythrocytic stages of the Malaria parasites *Plasmodium falciparum* and *P. vivax*. *Am J Trop Med Hyg* **74**, 708-715, doi:DOI 10.4269/ajtmh.2006.74.708 (2006).
- 4 Jahns, A. C., Haverkamp, R. G. & Rehm, B. H. Multifunctional inorganic-binding beads self-assembled inside engineered bacteria. *Bioconjug Chem* **19**, 2072-2080, doi:10.1021/bc8001979 (2008).
- 5 Jahns, A. C. *et al.* In vivo self-assembly of fluorescent protein microparticles displaying specific binding domains. *Bioconjug Chem* **24**, 1314-1323, doi:10.1021/bc300551j (2013).
- 6 Yang, A.S.P. *et al.* AMA1 and MAEBL are important for *Plasmodium falciparum* sporozoite infection of the liver. *Cell. Microbiol.* e12745 (2017) <https://doi.org/10.1111/cmi.12745>
- 7 Yang, A.S.P. *et al.* Cell Traversal Activity Is Important for *Plasmodium falciparum* Liver Infection in Humanized Mice. *Cell Rep.*18, 3105-3116 (2017) <https://doi.org/10.1016/j.celrep.2017.03.017>
